# Supplementary material
Source: HighWire-hosted journal article supplement (https://rc.rcjournal.com/highwire/filestream/25872/field_highwire_adjunct_files/1/Supplemental_Table_1.pdf)
Supplement: Supplemental_Table_1.pdf [file Supplemental_Table_1.pdf]

| System     | Comparisons of CPAP systems before leakage |                                       |
|------------|--------------------------------------------|---------------------------------------|
|            | Delivered CPAP (cm H2O)                    | Amplitude of Pressure Swings (cm H2O) |
|            | Mean (95% CI)                              | Mean (95%CI)                          |
| AVEA       | 4.42 (4.40-4.45) a                         | 5.42 (5.41-5.44)                      |
| Evita XL   | 3.50 (3.49-3.50)                           | 2.96 (2.92-3.00) b                    |
| Fabian     | 4.44 (4.42-4.45) a                         | 1.35 (1.34-1.37)                      |
| Engström   | 5.04 (5.04-5.05)                           | 5.76 (5.75-5.76)                      |
| Leoni Plus | 3.46 (3.45-3.46)                           | 8.46 (8.44-8.49)                      |
| SERVO-i    | 4.13 (4.13-4.14)                           | 3.01 (2.98-3.03) b                    |
| VN500      | 4.55 (4.55-4.55)                           | 4.36 (4.33-4.39)                      |

**Supplementary Table 1:** Comparison of delivered CPAP and amplitude of pressure swings before leakage. Data from ten consecutive breaths and four simulations (n=40). The differences between all systems were statistically significant except Avea and Fabian (Delivered CPAP, indicated by 'a') and Evita XL and SERVO-i (Amplitude of Pressure Swings, indicated by 'b').
